# Supplementary material
Source: PubMed Central journal article supplement (PMC7549645)

## **The stress specific impact of ALKBH1 on tRNA cleavage and tiRNA generation**

Sherif Rashad, MD, PhD<sup>1,2\*</sup>. Xiaobo Han, PhD<sup>1</sup>. Kanako Sato, MD<sup>1</sup>. Eikan Mishima, MD, PhD<sup>3</sup>. Takaaki Abe, MD, PhD<sup>4</sup>. Kuniyasu Niizuma, MD, PhD<sup>1,2,6</sup>. Teiji Tominaga, MD, PhD<sup>1</sup>

1- Department of Neurosurgery, Tohoku University Graduate school of Medicine, Japan.

2- Department of Neurosurgical Engineering and Translational Neuroscience, Tohoku University Graduate school of Medicine, Japan.

3- Division of Nephrology, Endocrinology, and Vascular Medicine, Tohoku University Graduate School of Medicine, Sendai, Japan

4- Department of Clinical Biology and Hormonal Regulation, Tohoku University Graduate School of Medicine, Sendai, Japan

5- Department of Medical Science, Tohoku University Graduate School of Biomedical Engineering, Sendai, Japan

6- Department of Neurosurgical Engineering and Translational Neuroscience, Graduate school of Biomedical Engineering, Tohoku University, Japan.

**Corresponding author: Sherif Rashad, MD, PhD**

2-1 Seriyomachi, Aoba-ku, Sendai, Japan.

Postal code: 980-8575

Email: [sherif@nsg.med.tohoku.ac.jp](mailto:sherif@nsg.med.tohoku.ac.jp)

## Supplementary Figures

Supplementary Figure 1: Cropped gels in figure 1A

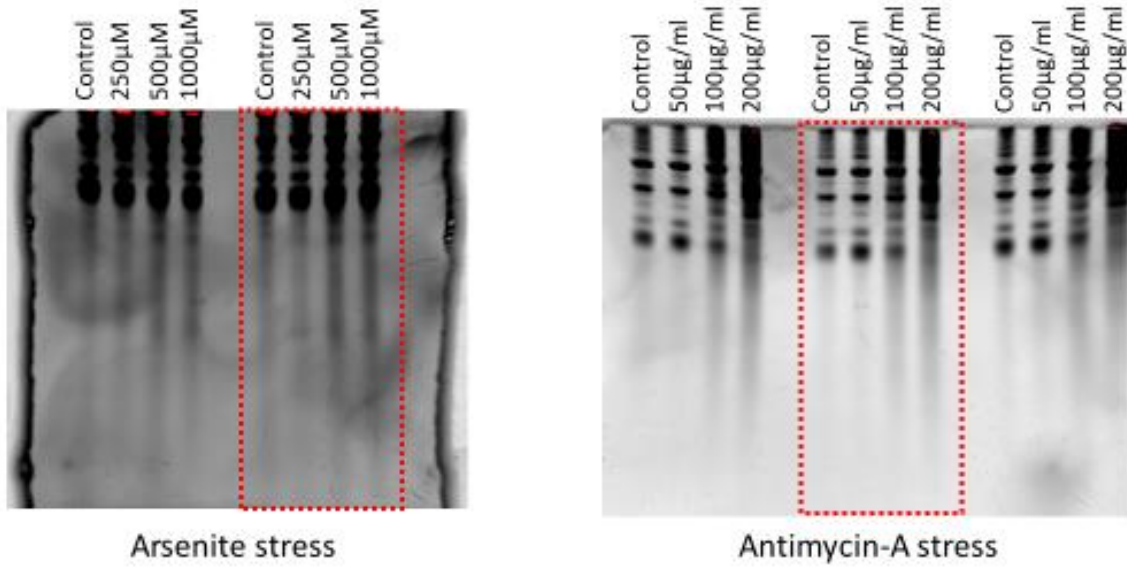

Supplementary Figure 2: Cropped gels in Figure 1B

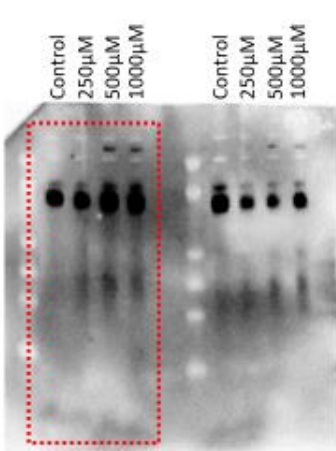

Arsenite stress

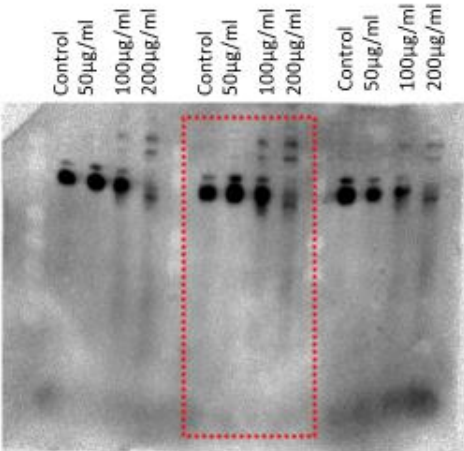

Antimycin-A stress

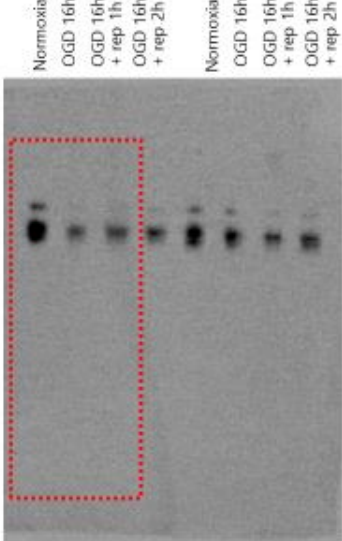

OGD-R stress

**Supplementary Figure 3:** Analysis of cell growth after Alkbh1 stable overexpression. **A:** WST-8 assay 1 week after seeding 5000 cells in 96 well plate and growth using different media (Medium 1: Full growth medium, Medium 2: Serum free medium, Medium 3: glucose free medium, Medium 4: serum/glucose free medium). **B:** Daily cell counting after plating  $1 \times 10^6$  in 6 well plate showing equal growth in  $B35^{\text{Mock}}$  and  $B35^{\text{ALK}}$  cells.

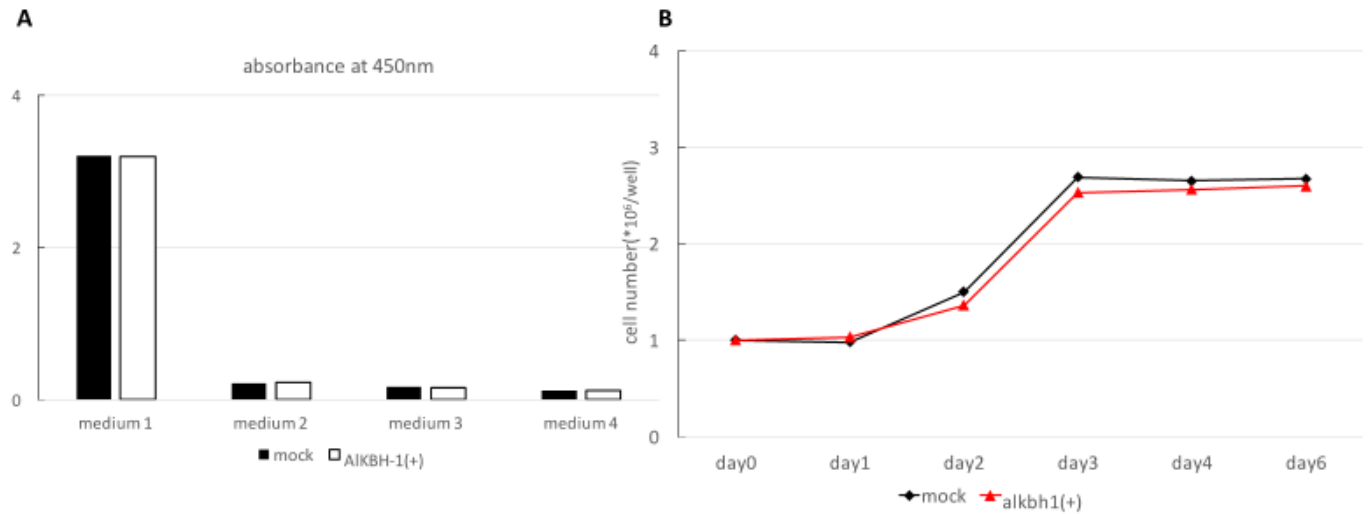

**Supplementary Figure 4:** GFP signal analysis 48 hours after transfection of B35 cells with Lentiviral particles encoding Alkbh1 or Mock sequence showing > 90% transfection efficiency

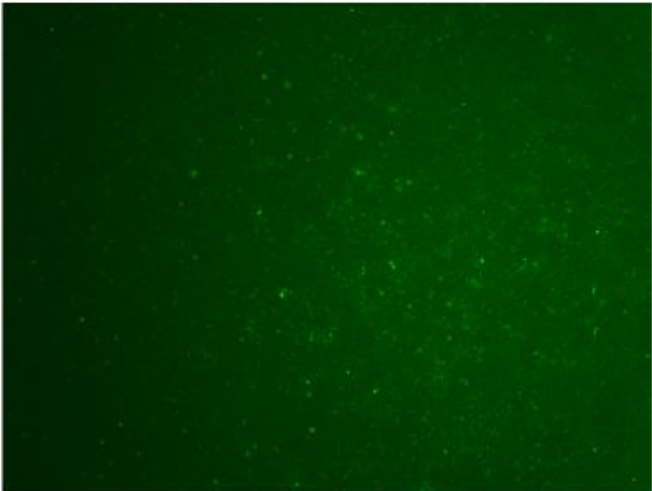

Lenti-ALKBH1

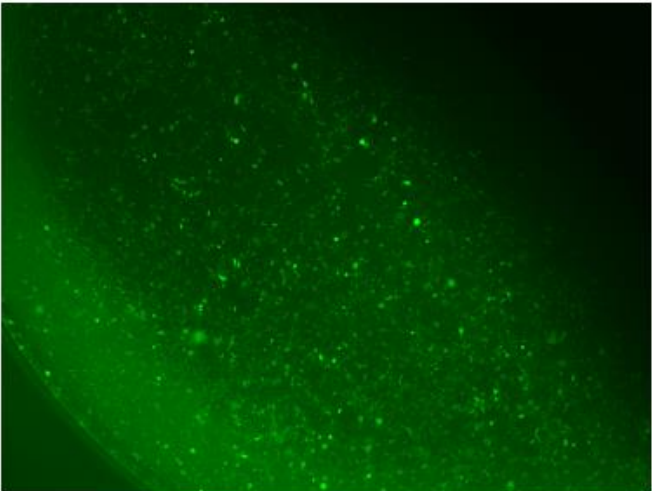

Lenti-Mock

**Supplementary Figure 5:** Quantification of tRNA fragments after Alkbh1 siRNA and stress. Asterisk: Statistically significant ( $p < 0.05$ , Fold change  $> 1.5$ ). N = 3 per group

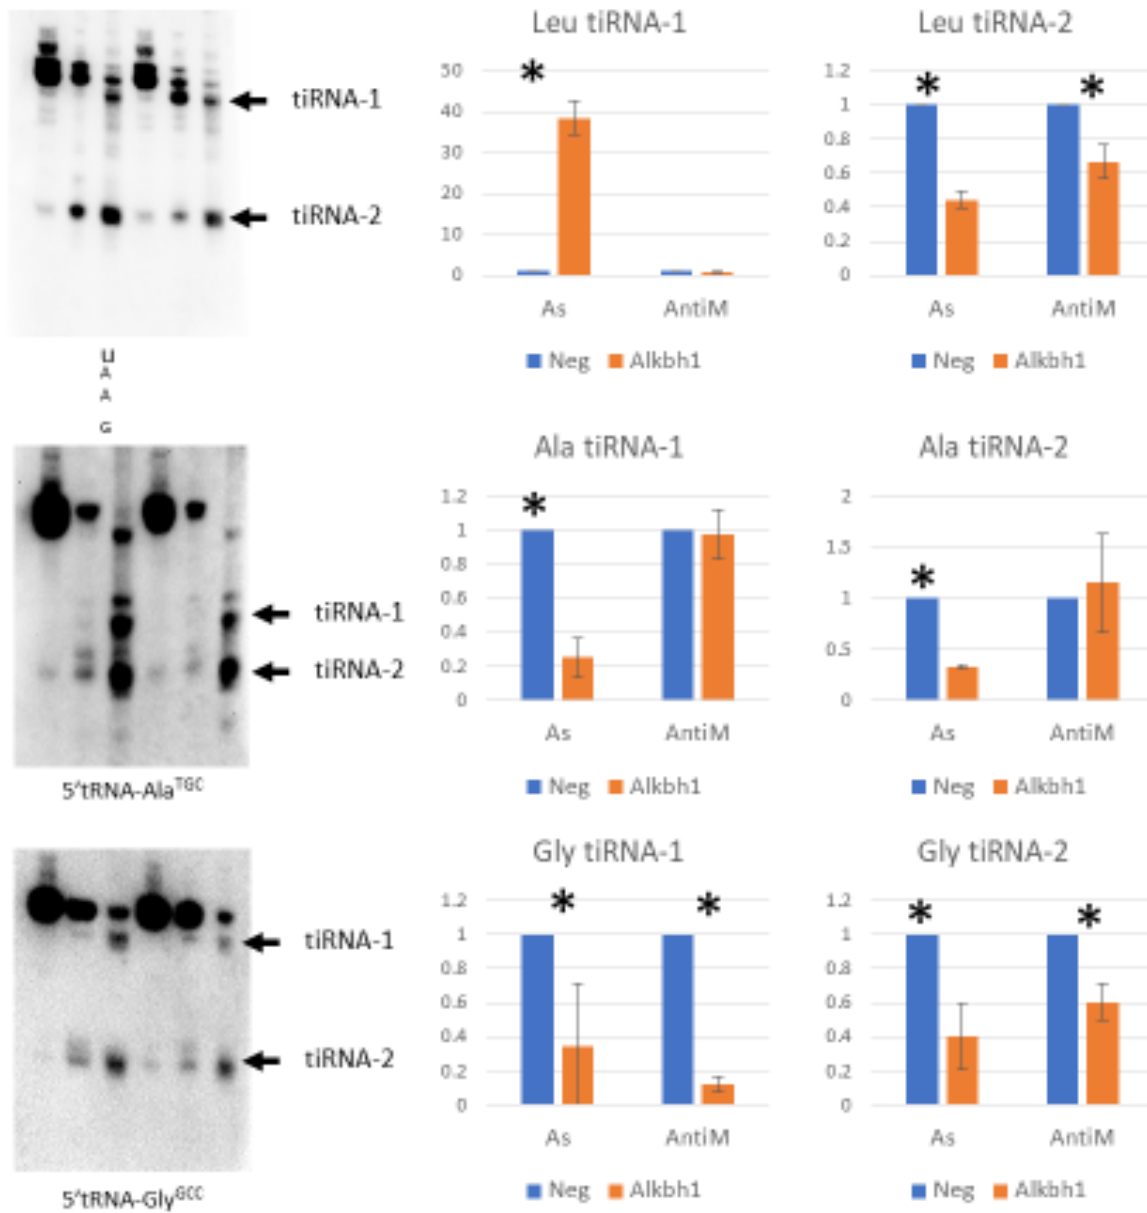

**Supplementary Figure 6:** Quantification of tRNA fragments after Alkbh1 siRNA and stress (Continued). Asterisk: Statistically significant ( $p < 0.05$ , Fold change  $> 1.5$ ). N = 3 per group

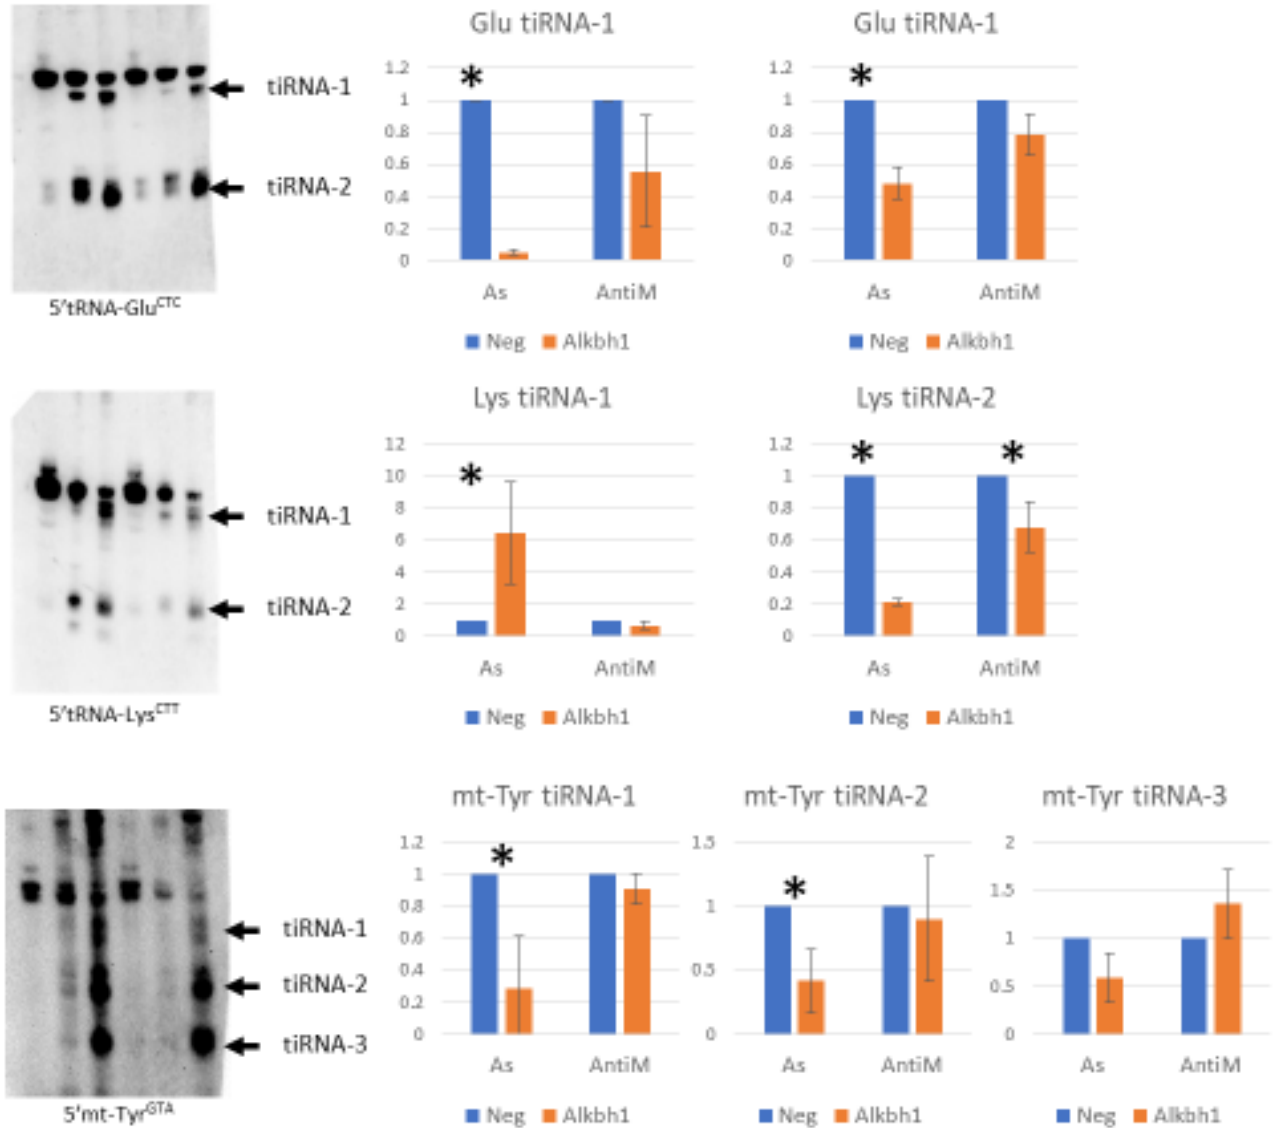

**Supplementary Figure 7:** Quantification of tRNA fragments after Alkbh1 Lentiviral overexpression and stress. Asterisk: Statistically significant ( $p < 0.05$ , Fold change  $> 1.5$ ). N = 3 per group. Note: mt-Tyr tRNAs were only calculated with Antimycin A stress as cleavage after arsenite was not sufficient for quantification.

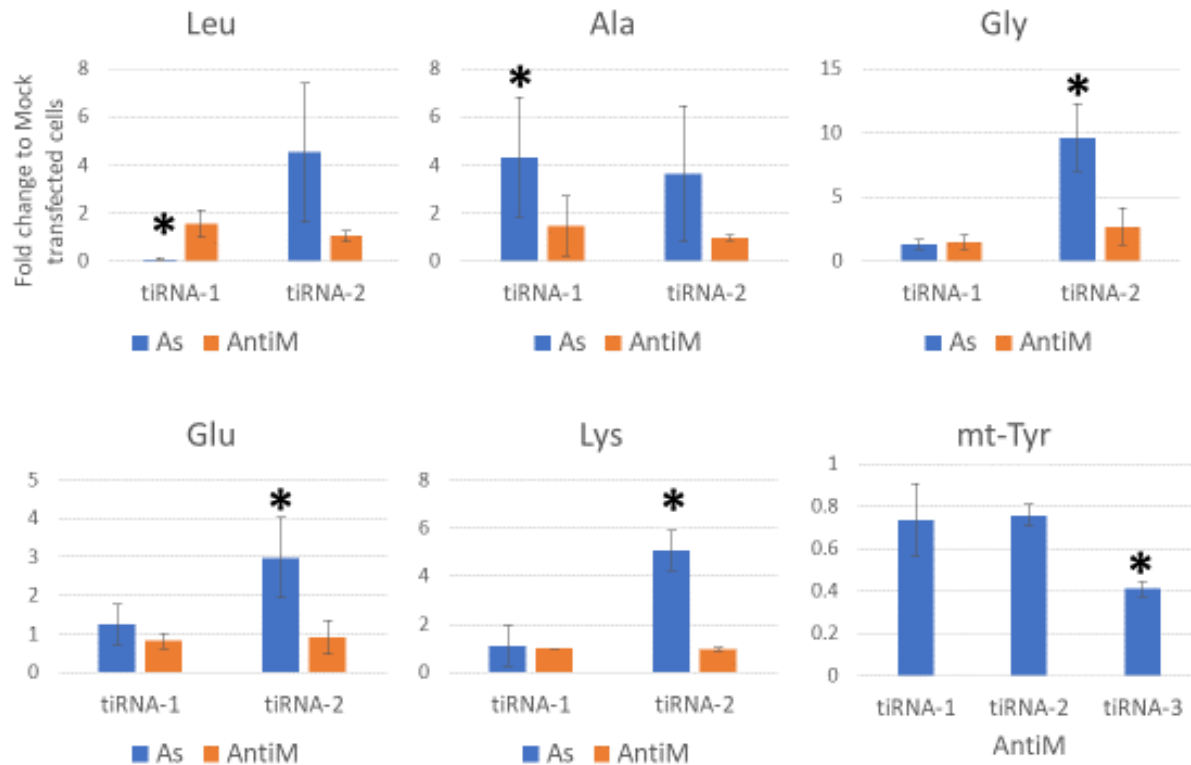

Supplement: KRNB_A_1779492_SM2156.pdf [file KRNB_A_1779492_SM2156.pdf]
